# Supplementary material
Source: Springer Nature journal article supplement (https://www.springermedizin.de/resource/supplementary/12883_2014_1052_MOESM6_ESM.pdf/9456438)

**A** Anti-NMDA vs. controls

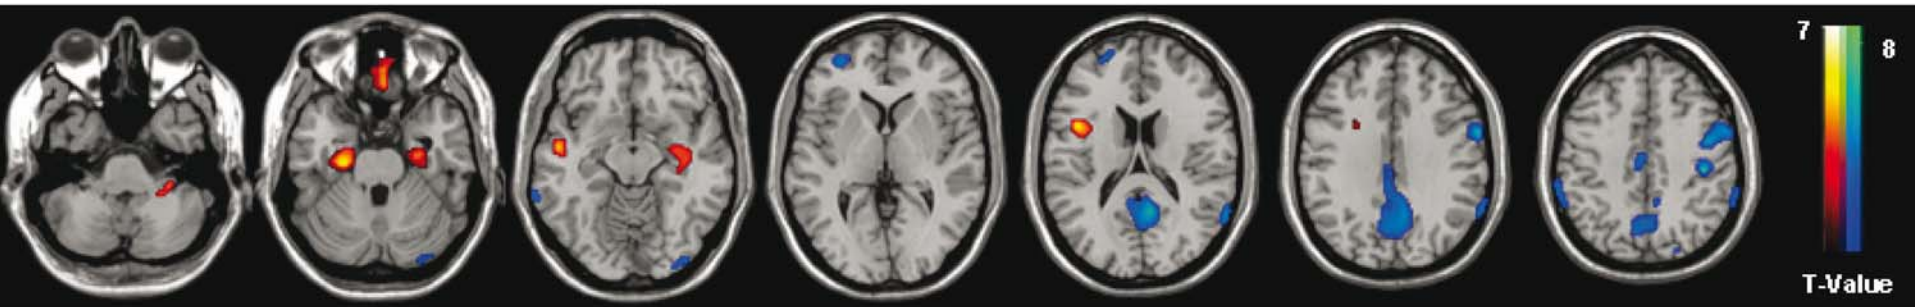

**B** Anti-LGI1 vs. controls

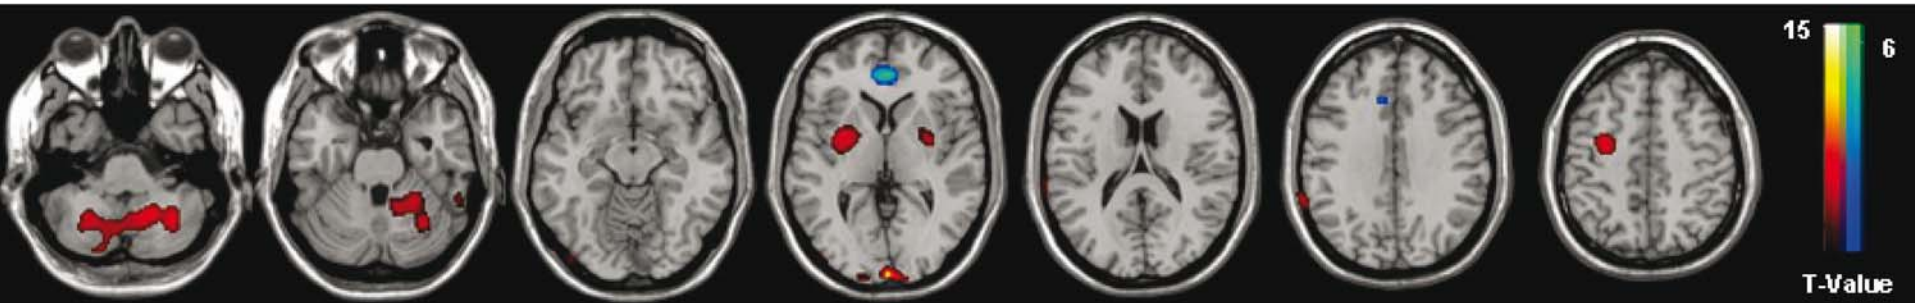

**C** Anti-NMDA vs. Anti-LGI1

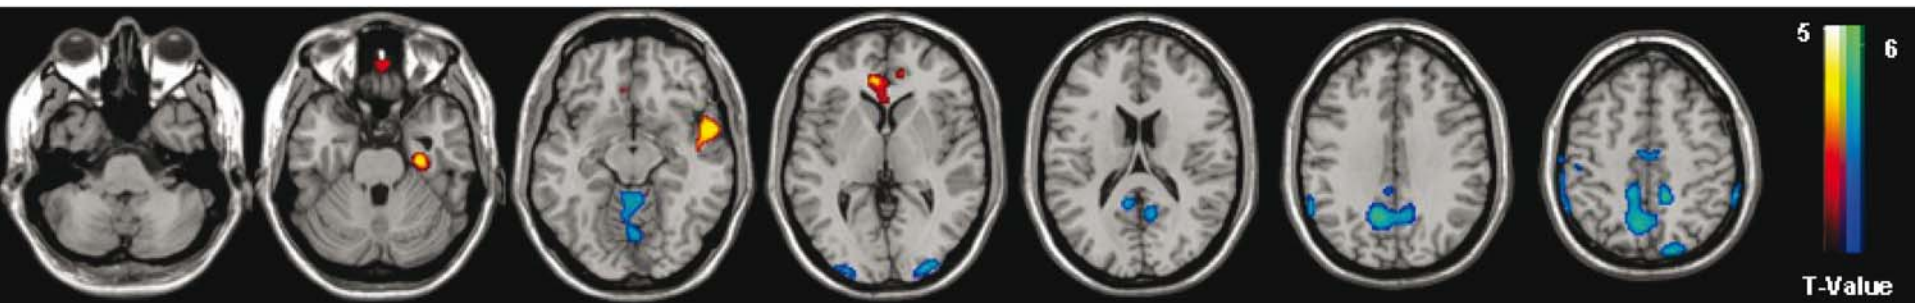

Supplement: MOESM6 [file 9456438]
